# Supplementary material
Source: PubMed Central journal article supplement (PMC5203953)
Supplement: NIHMS830654-supplement-supplement_1.pdf [file NIHMS830654-supplement-supplement_1.pdf]

**Supplemental Table 1. Association of DTNP<sub>V1</sub>, prevalent cardiovascular disease, and index ECG referral with all-cause mortality in Cox regression analyses, after exclusion of patients with index ECG recorded in Intensive Care Units or Emergency Department**

| Predictor                        | Model | HR(95%CI)       | P-value |
|----------------------------------|-------|-----------------|---------|
| DTNP <sub>V1</sub>               | 1     | 2.16(1.85-2.53) | <0.0001 |
| DTNP <sub>V1</sub>               | 2     | 2.01(1.69-2.39) | <0.0001 |
| DTNP <sub>V1</sub>               | 3     | 2.00(1.68-2.39) | <0.0001 |
| DTNP <sub>V1</sub>               | 4     | 2.09(1.89-2.45) | <0.0001 |
| Cardiovascular disease           | 4     | 1.20(1.02-1.41) | 0.033   |
| ECG referred by non-cardiologist | 4     | Reference       |         |
| Unknown ECG referral             | 4     | 1.01(0.86-1.23) | 0.535   |
| ECG referred by cardiologist     | 4     | 0.66(0.51-0.84) | 0.001   |

Model 1 was minimally adjusted by age and sex, and quality control metric (prescription of any medication at any time in the medical history). Model 2 was in addition adjusted for prevalent coronary heart disease, heart failure, history of myocardial infarction, coronary artery bypass grafting, newly (during follow-up) implanted pacemaker or ICD, history of comorbidities (diabetes, chronic obstructive pulmonary disease, chronic kidney disease, chronic liver disease), and ECG parameters (heart rate, PR and QTc intervals). Model 3 was in addition adjusted for the historical (current or discontinued) use of medications (angiotensin-converting-enzyme inhibitors /angiotensin II receptor blockers, beta-blockers, antiarrhythmics, calcium channel blockers, diuretics, antiplatelets (including aspirin), anticoagulants (including heparin), lipid-lowering drugs, and nitrates/hydralazine), and index ECG referral from cardiologist. Model 4 was adjusted for age, sex, and the use of any medication at any time in the medical record history ( a proxy for OHSU healthcare system utilization).

**Supplemental Table 2. Association of DTNP<sub>V1</sub> with atrial fibrillation and atrial flutter in logistic regression after exclusion of patients with index ECG recorded in Intensive Care Units or Emergency Department**

|         | Atrial fibrillation |         | Atrial flutter  |         |
|---------|---------------------|---------|-----------------|---------|
|         | OR(95%CI)           | P-value | OR(95%CI)       | P-value |
| Model 1 | 0.85(0.73-0.999)    | 0.048   | 1.49(1.09-2.02) | 0.012   |
| Model 2 | 1.29(1.06-1.58)     | 0.012   | 1.43(1.01-2.02) | 0.047   |
| Model 3 | 1.30(1.05-1.61)     | 0.017   | 1.48(1.03-2.13) | 0.033   |

Model 1 was minimally adjusted by age and sex, and quality control metric (prescription of any medication at any time in the medical history). Model 2 was in addition adjusted for prevalent coronary heart disease, heart failure, history of myocardial infarction, coronary artery bypass grafting, newly (during follow-up) implanted pacemaker or ICD, history of comorbidities (diabetes, chronic obstructive pulmonary disease, chronic kidney disease, chronic liver disease), and ECG parameters (heart rate, PR and QTc intervals). Model 3 was in addition adjusted for the historical (current or discontinued) use of medications (angiotensin-converting-enzyme inhibitors /angiotensin II receptor blockers, beta-blockers, antiarrhythmics, calcium channel blockers, diuretics, antiplatelets (including aspirin), anticoagulants (including heparin), lipid-lowering drugs, and nitrates/hydralazine), and index ECG referral from cardiologist.
